# Supplementary material for: Are physiological attributes of jockeys predictors of falls? A pilot study
Source: PubMed Central journal article supplement — BMJ Open. 2011 Jun 23;1(1):e000142. doi: 10.1136/bmjopen-2011-000142 (PMC3191430; doi:10.1136/bmjopen-2011-000142), 2011-06-23
Supplement: bmjopen-2011-000142.draft_revisions.pdf [file bmjopen-2011-000142.draft_revisions.pdf]

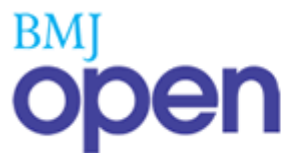

**Are physiological attributes of jockeys predictors of falls?: A controlled Tasmanian pilot study.**

|                               |                                                                                                                                                                                                                                                                                          |
|-------------------------------|------------------------------------------------------------------------------------------------------------------------------------------------------------------------------------------------------------------------------------------------------------------------------------------|
| Journal:                      | <i>BMJ Open</i>                                                                                                                                                                                                                                                                          |
| Manuscript ID:                | bmjopen-2011-000142                                                                                                                                                                                                                                                                      |
| Article Type:                 | Research                                                                                                                                                                                                                                                                                 |
| Date Submitted by the Author: | 13-Apr-2011                                                                                                                                                                                                                                                                              |
| Complete List of Authors:     | Hitchens, Peta; Menzies Research Institute Tasmania<br>Blizzard, Leigh; Menzies Research Institute Tasmania<br>Jones, Graeme; Menzies Research Institute Tasmania<br>Day, Lesley; Monash Injury Research Institute<br>Fell, James; University of Tasmania, School of Human Life Sciences |
| <b>Subject Heading</b>:       | Occupational & environmental medicine                                                                                                                                                                                                                                                    |
| Keywords:                     | SPORTS MEDICINE, EPIDEMIOLOGY, OCCUPATIONAL & INDUSTRIAL MEDICINE                                                                                                                                                                                                                        |
|                               |                                                                                                                                                                                                                                                                                          |

SCHOLARONE™  
Manuscripts

only

1  
2  
3 **Are physiological attributes of jockeys predictors of falls?: A controlled Tasmanian**  
4 **pilot study.**  
5  
6  
7

8 P Hitchens<sup>1</sup>, L Blizzard<sup>2</sup>, G Jones<sup>3</sup>, L Day<sup>4</sup>, J Fell<sup>5</sup>  
9

10  
11 1 Menzies Research Institute, University of Tasmania, Private Bag 23, Hobart TAS 7001,  
12  
13 Australia, petaleeh@utas.edu.au  
14

15  
16 2 Menzies Research Institute, University of Tasmania, Private Bag 23, Hobart TAS 7001,  
17  
18 Australia, Leigh.Blizzard@utas.edu.au  
19

20  
21 3 Menzies Research Institute, University of Tasmania, Private Bag 23, Hobart TAS 7001,  
22  
23 Australia, G.Jones@utas.edu.au  
24

25  
26 4 Monash Injury Research Institute, Building 70, Monash University VIC 3800, Australia,  
27  
28 Lesley.Day@monash.edu  
29

30  
31 5 School of Human Life Sciences, University of Tasmania, Locked Bag 1320 Launceston  
32  
33 TAS 7250, Australia, James.Fell@utas.edu.au  
34

35  
36  
37 **Corresponding author:**

38 Associate Professor Leigh Blizzard

39  
40 Postal address: Private Bag 23, Menzies Research Institute, Hobart TAS 7001

41  
42 Email: Leigh.Blizzard@utas.edu.au

43  
44 Telephone: +61 3 6226 7719

45  
46 Fax: +61 3 6226 7704  
47  
48  
49  
50  
51  
52

53 **Type of manuscript:** Original Article

54  
55 **Total word count:** 3,242 (excluding title page, abstract, references, tables and figures)

56  
57 **Abstract word count:** 232 words

58  
59 **Number of tables:** 3 **Number of figures:** 0  
60

## ABSTRACT

**Objectives:** This pilot study describes the physiological attributes of jockeys and track-work riders in Tasmania and investigates whether these attributes are associated with falls.

**Methods:** All jockeys and track-work riders licensed in Tasmania were invited to participate. The study group consisted of 8 jockeys (2 female, 6 male) and 20 track-work riders (14 female, 6 male). Measures of anthropometry, balance, reaction time, isometric strength, vertical jump, glycolytic and aerobic fitness, flexibility and body composition were conducted. Tests were designed to assess specific aspects of rider fitness and performance relevant to horse racing. For a subset of participants, we obtained information on falls and injuries. We used Poisson regression to estimate incidence rate ratios.

**Results:** Jockeys had better balance, faster mean reaction time, lower fatigue index, and a higher estimated  $\dot{V}O_{2\text{max}}$  than their track-work riding counterparts. Jockeys were also younger and smaller in stature than track-work riders and, when differences in body mass were taken into account, they had greater muscular strength and muscular (alactic) power. Important factors found to be associated with falls were lower aerobic and anaerobic fitness, greater muscular strength and power, and riding with the full foot in the stirrup irons compared to riding on the ball of the foot.

**Conclusion:** This pilot study shows that physiological attributes of jockeys and track-work riders can predict their risk of falling and are measurable using methods feasible for large-scale field work.

### Key Words (MeSH)

horse, muscle strength, fitness, body composition, bone density, injury

## ARTICLE SUMMARY

### Article focus

- Riding racehorses is a physically demanding and hazardous occupation, with most injuries to jockeys caused by falls.
- This study aims to investigate the association between physiological attributes and risk of falls for jockeys and track-work riders.

### Key messages

- Lower anaerobic and aerobic fitness and higher muscular strength and power were associated with greater risk of falls.
- Placement of the foot in the stirrup irons was also found to be associated with falls.
- This pilot study has confirmed that it is feasible to measure physiological attributes of jockeys and track-work riders that are predictive of the risk of falling.

### Strengths and limitations

- This was the first study to investigate whether physiological attributes are associated with falls to jockeys and track-work riders.
- Tests were deliberately restricted to those that could be conducted with robustly constructed and transportable equipment.
- We were able to recruit only a small number of participants, but our sample comprised 44% of the jockey population and 24% of the track-work rider population licensed in Tasmania.
- Some refinements to the testing methodology are needed.

## INTRODUCTION

The profession of a jockey or track-work rider in the thoroughbred racing industry is physically demanding. Riding race horses, during track-work or during a race, places demands on all three energy pathways (alactic, lactic and aerobic). Strength, strength endurance, balance, reaction time and flexibility are all considered to be important attributes of a successful rider.[1, 2]

A professional jockey in Australia may have as many as 1000 race rides per year, and may ride in races that range in distance from 800m to 3600m in races without jumps (“on the flat”) or from 2800m to 5500m in races over jumps. Jockeys may also undertake track-work riding. Track-work may involve riding many horses in training, and at varying intensities from walking a horse, slow or fast work, jump outs (practice jumping out of the barriers and galloping over a short distance) or barrier trials (unofficial races generally over shorter distances and with fewer starters, in which a horse or jockey may be assessed for suitability to compete in official races). Track-work riders are not able to ride in professional races unless they are a licensed jockey, and are generally heavier in weight than jockeys who need to be able to ride at weights as low as 51kg (flat races) or 64kg (jumps races).

There have been several studies describing the physical attributes and dietary habits of jockeys,[1, 3-7] and the demands of riding in races.[1, 8] The physiological attributes of grooms and exercise riders,[9] and the physiological demands of riding for equestrian and recreational horse riders[2, 10-14] have also been described. There is limited information on the fitness of jockeys, however, and no study has reported the fitness characteristics of track-work riders despite their integral role within the racing industry. The feasibility of

1  
2  
3 undertaking measurements of the physiological attributes of this highly mobile occupational  
4 group, using techniques suitable for large-scale fieldwork, has not been demonstrated.  
5  
6  
7  
8  
9

10 Further, there has been no investigation of the association between physiological attributes  
11 and risk of falls for jockeys and track-work riders. Riding racehorses is a hazardous  
12 occupation and most injuries to jockeys are caused by falls.[15] We have investigated risk  
13 factors for race-day jockey falls in flat racing using race-day data, and found that jockey-  
14 related factors included female sex of jockey, being an apprentice jockey, holding an amateur  
15 licence, and having fewer previous rides at a meeting.[16] We hypothesise that some  
16 physiological attributes of jockeys may also contribute to risk of falling. Given the lack of  
17 information on this occupational group, we undertook a study to describe the physiological  
18 attributes of jockeys and track-work riders licensed to ride in Tasmania and conducted a  
19 preliminary investigation into whether these attributes are associated with falls.  
20  
21  
22  
23  
24  
25  
26  
27  
28  
29  
30  
31  
32  
33  
34  
35

## 36 **METHODS**

37  
38 All jockeys (n=18; 6 apprentice, 12 full-licensed) and track-work riders (n=85) licensed to  
39 ride in Tasmania, the island state of Australia, were invited to participate. Reasons for non-  
40 participation included riders not currently or regularly riding, injury or illness, living  
41 interstate or being ineligible by reason of age (we excluded riders older than 50 years). The  
42 final study group consisted of 8 jockeys (2 female full-licensed, 4 male apprentice, 1 male  
43 full-licensed and 1 male full-licensed jumps jockey) and 20 track-work riders (14 female, 6  
44 male). This represents 44% of the jockey population and 24% of the track-work rider  
45 population in Tasmania.  
46  
47  
48  
49  
50  
51  
52  
53  
54  
55  
56  
57  
58  
59  
60

1  
2  
3 The study was approved by the Human Research Ethics Committee (Tasmania)(Reference  
4 Number H0009692).  
5  
6  
7  
8  
9

10 Each participant was tested at one of three different locations in Tasmania - Menzies  
11 Research Institute (Hobart), University of Tasmania Exercise Research Laboratory  
12 (Launceston) and the Devonport Racing Club (Devonport). The same equipment was  
13 transported to and used at each location. All tests were supervised by the same technician.  
14  
15  
16  
17  
18  
19

20 Tests were selected on their practicality and portability and based on previous studies of  
21 horse riders[1, 2, 8, 10-14] and performance attributes of athletes.[17] These tests were  
22 designed to assess specific aspects of fitness that may be relevant to the requirements of  
23 thoroughbred racing and track-work riding.  
24  
25  
26  
27  
28  
29  
30  
31

32 Participants were provided with an outline of the test protocols prior to formal testing.  
33  
34 Participants were required to be in good health and fully recovered from previous injuries.  
35  
36 For jockeys, testing did not occur on the day before or after race-day, or at times of  
37 significant body mass wasting.  
38  
39  
40  
41  
42  
43  
44  
45

46 Height was measured to the nearest 0.1cm using a Leicester Height Measure (Invicta,  
47 Leicester, UK). Body mass was measured to the nearest 0.1kg using a Heine Portable  
48 Professional Scale (Heine, Dover, NH, USA). Body mass index (BMI) was calculated. Body  
49 composition (total percent body fat) and bone mineral density ( $\text{g}\cdot\text{cm}^{-2}$ ) were measured by the  
50 technique of dual-energy X-ray absorptiometry (DXA) using one Lunar DPX densitometer  
51 (Lunar, Madison, WI). Only 11 of the participants underwent a DXA scan, and therefore  
52 these results were not included in the falls analysis.  
53  
54  
55  
56  
57  
58  
59  
60

1  
2  
3  
4  
5  
6 To measure dynamic unipedal balance, the participant was required to balance in a 'standing-  
7  
8 stork' pose (shoes removed, one leg lifted, placing the toes of that foot against the knee of the  
9  
10 opposite leg) on a 65mm foam insert (Airex® Balance-Pad Plus, Alcan Airex AG,  
11  
12 Switzerland) for as long as possible. A stopwatch was used to record the time that the  
13  
14 participant held position. The test was repeated three times on each leg. The best result for  
15  
16 each leg was used in analysis.  
17  
18  
19  
20  
21

22 The sit and reach test was used to measure flexibility of the lower back, hips and hamstring  
23  
24 muscles and the back and hip joints. Participants placed their feet flat against a 30cm high  
25  
26 box with shoes and socks removed and attempted to reach forward as far as possible with  
27  
28 knees fully extended. The level of the feet was recorded as the baseline, with positive scores  
29  
30 (in cm) achieved beyond this point. Participants were permitted three trials and the best result  
31  
32 was recorded.[18, 19]  
33  
34  
35  
36  
37  
38

39 Reaction time was assessed in milliseconds using a hand-held electronic timer with a light as  
40  
41 the stimulus, and with depression of a switch by the finger as the response (Balance Systems,  
42  
43 Sydney, NSW). Ten practice trials were undertaken, followed by ten experimental trials.[20]  
44  
45  
46  
47

48 Strength was measured using isometric dynamometers. Grip strength was measured using a  
49  
50 hand-grip dynamometer (Smedley's TTM 100kg, Tokyo), and shoulder and arm strength  
51  
52 using a shoulder/arm dynamometer (TTM 100kg, Tokyo). This involved both push strength  
53  
54 (maximal voluntary isometric contraction of the shoulder flexors/adductors) and pull strength  
55  
56 (maximum voluntary isometric contraction of the shoulder extensors/abductors). Results were  
57  
58 recorded to the nearest 0.5kg. Leg and back strength was measured using a leg/back  
59  
60



1  
2  
3 dynamometer (Gloria TTM 300kg, Tokyo). Participants performed a maximum voluntary  
4 isometric contraction of the knee and hip extensors, with the knees flexed at 115° while  
5 maintaining a vertical spine position. The result was recorded to the nearest 1kg. Three trials  
6 were conducted for all strength tests with the best result used for analysis.  
7  
8  
9  
10  
11

12  
13  
14  
15 To measure explosive leg power, the standing vertical jump (counter movement jump) was  
16 conducted using a Yardstick® (Swift Performance Equipment, Lismore, New South Wales).  
17 The best trial was recorded and reported in centimetres jumped.[19] From this result, peak  
18 and mean alactic power were calculated using the Harman formulas.[21]  
19  
20  
21  
22  
23  
24

25  
26  
27 Anaerobic (lactic) fitness was assessed by the 30 second cycle test using an air-braked  
28 ergometer (Exertech, EX-10, Repco, Huntingdale, Australia).[22] Mean and peak lactic  
29 power were recorded in watts (W) and watts per kilogram of body mass ( $W \cdot kg^{-1}$ ). The fatigue  
30 index (percentage decline in power compared with the peak power output) was calculated.  
31  
32  
33  
34  
35  
36  
37

38  
39 Aerobic fitness was assessed using the YMCA submaximal exercise test performed on a  
40 friction-braked cycle ergometer (Monark Ergonomic 828E, Varberg, Sweden) to estimate  
41 maximal oxygen uptake ( $\dot{V}O_{2 \max}$ ,  $ml \cdot kg^{-1} \cdot min^{-1}$ ).[17]  
42  
43  
44  
45  
46  
47  
48

49 The participants were asked how they positioned their feet in the stirrup irons when riding  
50 (riding style). They were classified as riding with their full foot lodged firmly in the irons  
51 (full foot), or with the ball of their foot in the irons (ball of foot), or with only the toe of their  
52 boot in the iron (toe-in-iron).  
53  
54  
55  
56  
57  
58  
59  
60

1  
2  
3 Incident data on falls of licensed Tasmanian track-work riders during track-work were  
4 collected by participants completing a diary for 12 months following their fitness assessment.  
5  
6 The follow-up period was 1 March 2008 to 31 May 2009. The participants were instructed to  
7  
8 record, on a monthly basis, the average number of track-work rides per week. For each fall,  
9  
10 participants were asked to complete an incident report form. Of the track-work riders, 7  
11  
12 returned their diaries.  
13  
14  
15  
16  
17  
18  
19

20 None of the jockeys returned their track-work diaries. However, we did obtain incident data  
21  
22 on falls by the 7 licensed flat racing jockeys at race meetings. The data were collated through  
23  
24 a search of stewards' reports provided by Racing Services Tasmania (RST), the principal  
25  
26 racing authority of that state. Racing Information Services Australia (RISA) provided  
27  
28 comprehensive data on every race meeting run by RST. These data were merged with the  
29  
30 incident falls data. Details are provided elsewhere.[15] To match the number of rides taken  
31  
32 by track-work riders, we included race rides during the period 1 June 2007 to 31 May 2009.  
33  
34  
35  
36  
37  
38

39 Anthropometric (height, mass, BMI, % body fat and BMD) and fitness (aerobic, anaerobic,  
40  
41 muscular strength and power, flexibility, balance and reaction time) measures of jockeys and  
42  
43 track-work riders were compared using regression analysis. Right-skewed data were log  
44  
45 transformed prior to analysis.  
46  
47  
48  
49

50 Univariable Poisson regression was used to estimate incidence rate ratios (IRR) with 95%  
51  
52 confidence intervals (CI) by modelling the logarithm of the mean number of falls as a  
53  
54 function of covariates, with the logarithm of the number of rides as an offset. Interaction of  
55  
56 licence type was assessed from the coefficients of product terms. Effect modification was  
57  
58 considered present if the test of the coefficient of a product term yielded a p value less than  
59  
60

1  
2  
3 0.05 in a dataset expanded with 9 duplicates. Results for variables that showed significant  
4  
5 interaction with licence type are reported separately (Table 3) from those where interaction  
6  
7 was not present (Table 2).  
8  
9

## 10 11 12 **RESULTS**

13  
14 Participant age and anthropometric characteristics are described in Table 1. Jockeys were  
15  
16 younger in age, shorter in height, lower in mass and BMI, and had lower percentage total  
17  
18 body fat and total bone mineral density than track-work riders.  
19  
20  
21

22  
23  
24 The participant groups were similar in measures of grip strength, shoulder pull strength, and  
25  
26 leg and back strength. Jockeys had better balance, faster reaction time, lower fatigue index,  
27  
28 and a higher estimated  $\dot{V}O_{2\max}$ , but were less flexible and had lower shoulder push strength,  
29  
30 than track-work riders. Additionally, jockeys had greater muscular strength and power, once  
31  
32 accounting for the body mass (per kg) of the participant. Detailed results are available in a  
33  
34 Supplementary Appendix.  
35  
36  
37  
38  
39  
40  
41  
42  
43  
44  
45  
46  
47  
48  
49  
50  
51  
52  
53  
54  
55  
56  
57  
58  
59  
60

Table 1: Descriptive characteristics of jockeys and track-work riders in Tasmania

| Study factor                           | Jockeys<br>(n=8) | Track-work riders<br>(n=20) |
|----------------------------------------|------------------|-----------------------------|
| Age (years)                            |                  |                             |
| Median                                 | 27.00            | 36.50                       |
| Mean ( $\pm$ SD)                       | 28.75 (10.10)    | 33.20 (11.08)               |
| Range                                  | 18, 41           | 15, 47                      |
| Height (cm)                            |                  |                             |
| Median                                 | 163.45           | 168.25                      |
| Mean ( $\pm$ SD)                       | 163.39 (7.08)    | 166.51 (7.36)               |
| Range                                  | 154.4, 174.9     | 156.6, 179.5                |
| Mass (kg)                              |                  |                             |
| Median                                 | 51.75            | 65.90                       |
| Mean ( $\pm$ SD)                       | 55.08 (5.87)     | 67.32 (12.51)               |
| Range                                  | 50.5, 66.3       | 44.2, 90.5                  |
| BMI                                    |                  |                             |
| Median                                 | 20.63            | 24.00                       |
| Mean ( $\pm$ SD)                       | 20.62 (1.58)     | 24.13 (3.28)                |
| Range                                  | 18.45, 23.27     | 18.02, 30.52                |
| Body fat (%) <sup>a</sup>              |                  |                             |
| Median                                 | 15.90            | 29.45                       |
| Mean ( $\pm$ SD)                       | 13.98 (3.52)     | 28.15 (8.21)                |
| Range                                  | 8.50, 16.90      | 17.00, 37.60                |
| BMD (g.cm <sup>-2</sup> ) <sup>a</sup> |                  |                             |
| Median                                 | 1.167            | 1.273                       |
| Mean ( $\pm$ SD)                       | 1.157 (0.068)    | 1.312 (0.103)               |
| Range                                  | 1.085, 1.246     | 1.206, 1.473                |

<sup>a</sup> Subset of data (n=5 jockeys; n=6 track-work riders).

Table 2 presents unadjusted and adjusted (for age and sex) incidence rate ratios of physiological attributes associated with falls for factors that did not differ between jockeys and track-work riders. Seven track-work riders returned their fall and injury diaries. The track-work riders reported a total of 24 falls from 2,996 rides (0.80 falls per 100 rides). Of these falls, 13 (54%) resulted in an injury being sustained. A total of 13 falls from 2,978 race rides (0.44 falls per 100 rides) were experienced by the jockeys in our study. Of these falls, 3 (23%) resulted in an injury being sustained.

Table 2: Unadjusted and adjusted incidence rate ratios of factors associated with race-day falls by flat racing jockeys (n=7) from 1 June 2007 to 31 May 2009, and with falls during track-work for track-work riders (n=7) from 1 March 2008 to 31 May 2009.

| Study factor                                               | Falls | Rides | Unadjusted IRR (95% CI)        | Adjusted IRR (95% CI) <sup>a</sup> |
|------------------------------------------------------------|-------|-------|--------------------------------|------------------------------------|
| Licence                                                    |       |       |                                |                                    |
| Jockey                                                     | 13    | 2,978 | 1.00                           | 1.00                               |
| Track-work rider                                           | 24    | 2,996 | 1.84 (0.90, 3.74)              | 3.54 (2.07, 6.06) <sup>d</sup>     |
| Sex                                                        |       |       |                                |                                    |
| Male                                                       | 15    | 2,519 | 1.00                           | 1.00                               |
| Female                                                     | 22    | 3,455 | 1.07 (0.52, 2.19)              | 0.45 (0.17, 1.20)                  |
| Age                                                        | 37    | 5,974 | 1.03 (1.00, 1.06)              | 1.05 (1.01, 1.10) <sup>b</sup>     |
| BMI                                                        | 37    | 5,974 | 1.12 (1.02, 1.21) <sup>b</sup> | 1.15 (1.08, 1.23) <sup>d</sup>     |
| Log of balance pooled (sec)                                | 37    | 5,974 | 0.87 (0.59, 1.28)              | 1.28 (0.95, 1.72)                  |
| Flexibility (cm)                                           | 37    | 5,974 | 0.99 (0.94, 1.04)              | 0.96 (0.91, 1.01)                  |
| Muscular strength and power                                |       |       |                                |                                    |
| Push strength (kg)                                         | 37    | 5,974 | 1.00 (0.97, 1.03)              | 1.01 (0.97, 1.04)                  |
| Pull strength (kg)                                         | 37    | 5,974 | 1.03 (0.98, 1.09)              | 1.09 (1.04, 1.14) <sup>d</sup>     |
| Leg/back strength (kg/10)                                  | 37    | 5,974 | 1.11 (1.00, 1.23) <sup>b</sup> | 1.07 (1.01, 1.14) <sup>b</sup>     |
| Absolute jump height (cm)                                  | 37    | 5,974 | 0.97 (0.92, 1.02)              | 0.93 (0.85, 1.01)                  |
| Mean power (Watts.kg <sup>-1</sup> )                       | 37    | 5,974 | 1.19 (0.94, 1.50)              | 1.14 (0.91, 1.42)                  |
| Anaerobic fitness                                          |       |       |                                |                                    |
| Mean power (Watts.kg <sup>-1</sup> )                       | 37    | 5,974 | 0.90 (0.77, 1.05)              | 0.85 (0.67, 1.09)                  |
| Peak power (Watts.kg <sup>-1</sup> )                       | 37    | 5,974 | 0.91 (0.82, 1.00)              | 0.87 (0.74, 1.02)                  |
| Total work (hectojoules.kg <sup>-1</sup> )                 | 37    | 5,974 | 0.78 (0.46, 1.32)              | 0.83 (0.34, 1.98)                  |
| Fatigue index (%)                                          | 37    | 5,974 | 0.97 (0.96, 0.99) <sup>d</sup> | 0.98 (0.96, 1.00)                  |
| Aerobic fitness                                            |       |       |                                |                                    |
| $\dot{V}O_2$ max (ml.kg <sup>-1</sup> .min <sup>-1</sup> ) | 37    | 5,974 | 0.97 (0.93, 1.01)              | 0.93 (0.90, 0.97) <sup>d</sup>     |
| Riding style                                               |       |       |                                |                                    |
| Ball of foot (n=9)                                         | 19    | 4,176 | 1.00                           | 1.00                               |
| Toe-in-iron (n=2)                                          | 5     | 684   | 1.61 (0.99, 2.61)              | 1.12 (0.60, 2.08)                  |
| Full foot (n=3)                                            | 13    | 1,114 | 2.56 (1.31, 5.04) <sup>c</sup> | 2.37 (1.46, 3.85) <sup>d</sup>     |

<sup>a</sup>Adjusted for age and sex; <sup>b</sup> p<0.05; <sup>c</sup> p<0.01; <sup>d</sup> p<0.001.

Table 2 shows that lower aerobic fitness was associated with greater risk of falls. The associations of measures of anaerobic fitness were not statistically significant but, became significant when we expanded the dataset from n=14 to n=28 (peak power per kg of body

mass, fatigue index) or to n=42 (mean power per kg of body mass) by duplicating observations.

Greater shoulder pull strength and greater leg and back strength were also associated with a higher incidence of falls (Table 2). Other measures of muscular strength differed by licence type. Table 3 shows that jockeys who had lower grip strength or higher peak alactic power had a higher fall incidence than other jockeys, with the opposite being the case for track-work riders.

Table 3: Adjusted incidence rate ratios of factors associated with falls that differed by jockey and track-work riders

| Study factor                         | Jockey                         | Track-work rider               |
|--------------------------------------|--------------------------------|--------------------------------|
|                                      | IRR (95% CI) <sup>a</sup>      | IRR (95% CI) <sup>a</sup>      |
| Mass (kg)                            | 0.82 (0.81, 0.83) <sup>d</sup> | 1.05 (1.02, 1.07) <sup>d</sup> |
| Height (cm)                          | 0.92 (0.89, 0.96) <sup>d</sup> | 1.05 (0.92, 1.19)              |
| Muscular strength and power          |                                |                                |
| Grip strength (pooled)               | 0.81 (0.73, 0.89) <sup>d</sup> | 1.12 (1.08, 1.16) <sup>d</sup> |
| Peak power (Watts.kg <sup>-1</sup> ) | 1.08 (1.04, 1.13) <sup>d</sup> | 0.95 (0.94, 0.96) <sup>d</sup> |

<sup>a</sup>Adjusted for age and sex; <sup>b</sup> p<0.05; <sup>c</sup> p<0.01; <sup>d</sup> p<0.001.

Placement of the foot in the stirrup irons was associated with falls. Both jockeys and track-work riders that ride with the full foot in the stirrup irons had a higher fall incidence than did those riding with the ball of the foot in the irons (Table 2).

## DISCUSSION

In this investigation of the physiological attributes of jockeys and track-work riders in Tasmania, we found that jockeys had better balance, faster mean reaction time, lower fatigue index, and a higher estimated  $\dot{V}O_{2\max}$ . They were younger and smaller in stature than track-

1  
2  
3 work riders and, when differences in body mass were taken into account, they had greater  
4 muscular strength and alactic power (derived from the vertical jump). Furthermore, in a study  
5 of falls experienced by jockeys on race-days and by track-work riders during track-work, we  
6 found older age, higher BMI, greater shoulder pull and greater leg and back strength, lower  
7 aerobic fitness, and riding with the full foot in the stirrup irons, were factors associated with  
8 an increased incidence of falls. Additionally, jockeys who were lower in mass, shorter in  
9 height, weaker in grip strength or had greater peak alactic power (per kg of body mass) had a  
10 higher fall incidence than other jockeys, with the reverse being the case for track-work riders.  
11  
12  
13  
14  
15  
16  
17  
18  
19  
20  
21  
22  
23  
24

25 The anthropometric attributes of jockeys reported in this study were generally similar to those  
26 of New Zealand and Irish jockeys reported in previous studies,[5-7] but the track-work riders  
27 more closely resembled the anthropometric characteristics of participants in equestrian  
28 studies.[11, 14] The grip strength of the jockeys and track-work riders was similar to that of  
29 participants in a study of Irish jockeys,[6] but higher than that of participants in an equestrian  
30 study.[14] Both groups also had above average relative  $\dot{V}O_{2\max}$  and average flexibility  
31 compared to normative data,[17] and greater anaerobic (lactic) power than those from an  
32 equestrian study.[14] We do not have normative data on balance or reaction times for this age  
33 group with which to make comparisons.  
34  
35  
36  
37  
38  
39  
40  
41  
42  
43  
44  
45  
46  
47  
48  
49

50 In this study, lower anaerobic and aerobic fitness were associated with greater risk of falls.  
51 Only the association with aerobic fitness was statistically significant but, if our participants  
52 are representative of jockeys and track-work riders in general, the association with measures  
53 of anaerobic fitness would have been statistically significant for peak power per kg of body  
54 mass and for fatigue index if the dataset had been just two times greater and significant for  
55 mean power per kg of body mass if the dataset had been three times greater. This is the first  
56  
57  
58  
59  
60

1  
2  
3 report of a finding that fitness is associated with falls by jockeys and track-work riders, but it  
4  
5 is consistent with findings for injuries to other occupational groups including manual material  
6  
7 handlers[23] and military personnel.[24, 25]  
8  
9

10  
11  
12 Paradoxically, we found that higher muscular strength and power were positively associated  
13  
14 with falls. This was seen for shoulder pull strength and leg and back strength, for peak alactic  
15  
16 power in jockeys, and for grip strength in track-work riders. This may be due to riders with  
17  
18 greater strength and power being placed on difficult or fractious horses because it is generally  
19  
20 industry practice to, where possible, not assign this task to less experienced riders. Possibly  
21  
22 consistent with this finding, industrial workers with greater isometric strength have been  
23  
24 reported to be at greater risk of back problems.[26] On the other hand, opposite results were  
25  
26 found for grip strength of jockeys and for peak alactic power of track-work riders in our study  
27  
28 and, in view of the inconsistencies, we can not discount the possibility that the inverse  
29  
30 associations with muscular strength and power are chance findings.  
31  
32  
33  
34  
35  
36  
37  
38

39 Placement of the foot in the stirrup irons was found to be associated with falls for both  
40  
41 jockeys and track-work riders. Those riding with the full foot in the stirrup irons had a higher  
42  
43 fall incidence than those riding with the ball of the foot in the irons. We also found a small  
44  
45 and statistically insignificant increase in risk for those who ride with their toe in the iron. Due  
46  
47 to safety concerns, all principal racing authorities in Australia require apprentices to ride with  
48  
49 at least their ball of their foot in the irons until they have gained adequate experience (Ring  
50  
51 2010 pers. comm.). We had too few inexperienced riders in our study to investigate this issue.  
52  
53  
54  
55  
56

57 This study adds to the limited information available on the physiological attributes of  
58  
59 jockeys, and is the first study to report comprehensively on the physiological characteristics  
60



1  
2  
3 of track-work riders. A strength of this study was the comprehensive range of tests that was  
4 implemented. Additionally, this allowed us to assess the feasibility of applying this battery of  
5 tests in large-scale fieldwork with this highly mobile occupational group, and we were able to  
6 get some confirmation that doing so was practicable. In a novel contribution, this was the first  
7 study to investigate whether these attributes are associated with falls to riders in both licence  
8 groups and we found that measurements of fitness and riding style were predictors of falls. So  
9 too were the measurements of muscular strength and power, albeit in an unexpected  
10 direction.  
11  
12  
13  
14  
15  
16  
17  
18  
19  
20  
21  
22  
23  
24

25 However, some limitations of this study should be borne in mind. Because our intention was  
26 to investigate methods appropriate for large-scale fieldwork, we deliberately restricted tests to  
27 those that could be conducted with robustly-constructed and transportable equipment. We did  
28 not use more sensitive equipment that may be more accurate. Due to difficulties in  
29 recruitment, we obtained only a small number of participants, but our sample comprised 44%  
30 of the jockey population and 24% of the track-work rider population licensed in Tasmania.  
31 Other studies involving jockeys have also reported low response proportions,[3, 27] and this  
32 is probably due to the working life of jockeys that necessitates considerable travel. Race  
33 meetings are conducted less regularly in Tasmania than in large metropolitan areas in  
34 Australia, and thus the jockeys in this current study may be more representative of the  
35 average jockey in Australia than of elite jockeys who ride in races more often. That we had a  
36 high proportion of females among track-work riders, and a low proportion of females among  
37 jockeys, is nevertheless consistent with the population frequencies. Furthermore, only 35% of  
38 track-work riders returned their fall and injury diaries and none of the jockeys returned theirs.  
39 It is possible that those who experienced more falls or injuries were more likely to return their  
40 diaries, leading to possible bias in the results if they also differed in respect of the factors  
41  
42  
43  
44  
45  
46  
47  
48  
49  
50  
51  
52  
53  
54  
55  
56  
57  
58  
59  
60

1  
2  
3 associated with falls. Lastly, our experience has suggested some refinements to the testing  
4  
5 methodology are needed. To obtain better measurements of  $\dot{V}O_{2\max}$ , portable gas analysis  
6  
7 could be employed during racing and track-work. A more complex stimulus reaction time  
8  
9 test, such as a go/no-go or choice reaction time,[28] should be employed because the simple  
10  
11 reaction time test we used was not sufficiently sensitive to differentiate between groups and  
12  
13 individuals. Furthermore, a riding-relevant balance test or core-stability test with higher  
14  
15 specificity is required.  
16  
17  
18  
19  
20  
21

## 22 CONCLUSION

23  
24 Riding thoroughbred racehorses is a hazardous occupation. This pilot study has confirmed  
25  
26 that it is feasible to measure physiological attributes of jockeys and track-work riders that are  
27  
28 predictive of the risk of falling. We have investigated risk factors for falls among jockeys  
29  
30 using routinely collected race-day data[16] but without the insights that may be possible  
31  
32 from actual measurements of the jockeys. What is now required is a large-scale study of the  
33  
34 physiological attributes of jockeys, that can provide the evidence base for improvements to  
35  
36 apprentice training and remedial riding programmes designed to remedy deficits in  
37  
38 physiological performance that lead to falls and possibly to establish minimum standards of  
39  
40 performance for jockey licencing.  
41  
42  
43  
44  
45  
46  
47  
48  
49  
50  
51  
52  
53  
54  
55  
56  
57  
58  
59  
60

## ACKNOWLEDGEMENTS

The research team thank Betfair Australasia, TOTE Tasmania and the Tasmanian Thoroughbred Racing Council for funding in support of this study. Protocols to assess physiological parameters were developed in consultation with the Tasmanian Jockeys' Association. We acknowledge Racing Information Services Australia (RISA) for provision of race data, Racing Services Tasmania for provision of stewards' reports, and Tim Albion for database support.

## COMPETING INTERESTS

None declared.

## FUNDING

Monetary donations for this project were received from Betfair Australasia, TOTE Tasmania and the Tasmanian Thoroughbred Racing Council. None of these entities were involved in any part of planning, design or conduct of the study, and they did not have any input into the manuscript.

## AUTHOR CONTRIBUTIONS

All authors contributed to analysis and interpretation of data, review and revision of the manuscript critically for important intellectual content, and provided final approval of the version to be published. Additionally, Peta Hitchens, Leigh Blizzard, and James Fell contributed to conception and design of the study, acquisition of data and drafting of the manuscript. I confirm that this manuscript is an independent contribution, has been read and approved by all co-authors.

## REFERENCES

1. Maddox D. For jockeys, small is beautiful - but difficult. *The physician and sportsmedicine* 1976;4(7):89-94.
2. Westerling D. A study of physical demands in riding. *Eur J Appl Physiol* 1983;50:373-382.
3. King MB, Mezey G. Eating behaviour of male racing jockeys. *Psychol Med* 1987;17(1):249-53.
4. Apted J. Lifestyle of nine jockeys. In: Truswell AS, Wahlqvist ML, eds. *Food habits in Australia*. Australia: Rene Gordon 1988:291-297.
5. Leydon MA, Wall C. New Zealand jockeys' dietary habits and their potential impact on health. *Int J Sport Nutr Exerc Metab* 2002;12(2):220-37.
6. Warrington G, Dolan E, McGoldrick A, et al. Chronic weight control impacts on physiological function and bone health in elite jockeys. *J Sports Sci* 2009;27(6):543-550.
7. Waldron-Lynch F, Murray B, Brady J, et al. High bone turnover in Irish professional jockeys. *Osteoporos Int* 2010;21(3):521-525.
8. Trowbridge EA, Cotterill JV, Crofts CE. The physical demands of riding in National Hunt races. *Eur J Appl Physiol* 1995;70:66-69.
9. Tobar H, Yamagishi K, Noda H, et al. Body mass index and serum gamma-glutamyltransferase level as risk factors for injuries related to professional horse racing: a prospective study. *J Occup Health* 2009;51(4):323-331.
10. Gutierrez Rincon JA, Vives Turco J, Muro Martinez I, et al. A comparative study of the metabolic effort expended by horse riders during a jumping competition. *Br J Sports Med* 1992;26(1):33-35.

11. Alfredson H, Hedberg G, Bergström E, et al. High thigh muscle strength but not bone mass in young horseback-riding females. *Calcif Tissue Int* 1998;62(6):497-501.
12. Devienne MF, Guezennec CY. Energy expenditure of horse riding. *Eur J Appl Physiol* 2000;82(5):499-503.
13. Lagarde J, Peham C, Licka T, et al. Coordination dynamics of the horse-rider system. *J Mot Behav* 2005;37(6):418-425.
14. Meyers MC. Effect of equitation training on health and physical fitness of college females. *Eur J Appl Physiol* 2006;98:177-184.
15. Hitchens PL, Blizzard CL, Jones G, et al. The incidence of race-day jockey falls in Australia, 2002–2006. *MJA* 2009;190(2):83-86.
16. Hitchens PL, Blizzard CL, Jones G, et al. Predictors of race-day jockey falls in flat racing in Australia. *Occup Environ Med* 2010;67:693-698. Published Online First: 23 June 2010 doi:10.1136/oem.2009.050567
17. American College of Sports Medicine. ACSM's Guidelines for exercise testing and prescription. 8 ed. Philadelphia: Lea & Febiger / Lippincott Williams & Wilkins 2010.
18. Wells KF, Dillon EK. The sit and reach - A test of back and leg flexibility. *Res Q Exerc Sport* 1952;23:115-118.
19. Ellis L, Gatin P, Lawrens S, et al. Testing protocols for the physiological assessment of team sports players. In: Gore CJ, ed. *Physiological tests for elite athletes*. Belconnen ACT: Australian Sport Commission 2000:128-144.
20. Lord SR, Menz HB, Tiedemann A. A physiological profile approach to falls risk assessment and prevention. *Phys Ther* 2003;83(3):237-252.
21. Harman EA, Rosenstein MT, Frykman PN, et al. Estimation of human power output from vertical jump. *J Appl Sports Sci Res* 1991;5:116-120.

- 1  
2  
3  
4  
5  
6  
7  
8  
9  
10  
11  
12  
13  
14  
15  
16  
17  
18  
19  
20  
21  
22  
23  
24  
25  
26  
27  
28  
29  
30  
31  
32  
33  
34  
35  
36  
37  
38  
39  
40  
41  
42  
43  
44  
45  
46  
47  
48  
49  
50  
51  
52  
53  
54  
55  
56  
57  
58  
59  
60
22. Telford RD, Minikin BR, Hahn AG. A simple method for the assessment of general fitness: the tri-level profile. *J Sci Med Sport* 1989;21:6-9.
  23. Craig BN, Congleton JJ, Kerk CJ, et al. Personal and non-occupational risk factors and occupational injury/illness. *Am J Ind Med* 2006;49(4):249-260.
  24. Knapik J, Ang P, Reynolds K, et al. Physical fitness, age, and injury incidence in infantry soldiers. *J Occup Med* 1993;35(6):598-603.
  25. Jones BH, Bovee MW, Harris III JM, et al. Intrinsic risk factors for exercise-related injuries among male and female army trainees. *Am J Sports Med* 1993;21(5):705-710.
  26. Batti'E MC, Bigos SJ, Fisher LD, et al. Isometric lifting strength as a predictor of industrial back pain reports. *Spine* 1989;14(8):851-856.
  27. Speed H, Seedsman T, Morris T, et al. *The welfare of retired jockeys*. Victoria: Victorian University of Technology, Centre for Rehabilitation, Exercise and Sports Science 2001.
  28. Welford AT. Choice reaction time: Basic concepts. In: Welford AT, ed. *Reaction Times*. New York: Academic Press 1980:73-128.

## LICENCE FOR PUBLICATION STATEMENT

The Corresponding Author has the right to grant on behalf of all authors and does grant on behalf of all authors, an exclusive licence (or non exclusive for government employees) on a worldwide basis to the BMJ Publishing Group Ltd to permit this article (if accepted) to be published in BMJ Open and any other BMJ PGL products and sub-licences such use and exploit all subsidiary rights, as set out in our licence (<http://oem.bmj.com/ifora/licence.pdf>).

For peer review only

STROBE Statement—Checklist of items that should be included in reports of *cross-sectional studies*

Note: Page numbers are those displayed in the top left/right corner of the submission pdf.

|                              | Item No | Recommendation                                                                                                                                                                                    | Page No.                            |
|------------------------------|---------|---------------------------------------------------------------------------------------------------------------------------------------------------------------------------------------------------|-------------------------------------|
| <b>Title and abstract</b>    | 1       | (a) Indicate the study's design with a commonly used term in the title or the abstract                                                                                                            | Title page                          |
|                              |         | (b) Provide in the abstract an informative and balanced summary of what was done and what was found                                                                                               | 2                                   |
| <b>Introduction</b>          |         |                                                                                                                                                                                                   |                                     |
| Background/rationale         | 2       | Explain the scientific background and rationale for the investigation being reported                                                                                                              | 4-5                                 |
| Objectives                   | 3       | State specific objectives, including any prespecified hypotheses                                                                                                                                  | 5                                   |
| <b>Methods</b>               |         |                                                                                                                                                                                                   |                                     |
| Study design                 | 4       | Present key elements of study design early in the paper                                                                                                                                           | 5-6                                 |
| Setting                      | 5       | Describe the setting, locations, and relevant dates, including periods of recruitment, exposure, follow-up, and data collection                                                                   | 5, 6 & 9                            |
| Participants                 | 6       | (a) Give the eligibility criteria, and the sources and methods of selection of participants                                                                                                       | 5                                   |
| Variables                    | 7       | Clearly define all outcomes, exposures, predictors, potential confounders, and effect modifiers. Give diagnostic criteria, if applicable                                                          | 6-9                                 |
| Data sources/<br>measurement | 8       | For each variable of interest, give sources of data and details of methods of assessment (measurement). Describe comparability of assessment methods if there is more than one group              | 6-9                                 |
| Bias                         | 9       | Describe any efforts to address potential sources of bias                                                                                                                                         | Potential bias discussed on page 16 |
| Study size                   | 10      | Explain how the study size was arrived at                                                                                                                                                         | 5 (pilot)                           |
| Quantitative variables       | 11      | Explain how quantitative variables were handled in the analyses. If applicable, describe which groupings were chosen and why                                                                      | 6-9                                 |
| Statistical methods          | 12      | (a) Describe all statistical methods, including those used to control for confounding                                                                                                             | 9                                   |
|                              |         | (b) Describe any methods used to examine subgroups and interactions                                                                                                                               | 9                                   |
|                              |         | (c) Explain how missing data were addressed                                                                                                                                                       | n/a                                 |
|                              |         | (d) If applicable, describe analytical methods taking account of sampling strategy                                                                                                                | n/a                                 |
|                              |         | (e) Describe any sensitivity analyses                                                                                                                                                             | n/a                                 |
| <b>Results</b>               |         |                                                                                                                                                                                                   |                                     |
| Participants                 | 13      | (a) Report numbers of individuals at each stage of study—eg numbers potentially eligible, examined for eligibility, confirmed eligible, included in the study, completing follow-up, and analysed | 5 & 9                               |



|                          |    |                                                                                                                                                                                                              |                                               |
|--------------------------|----|--------------------------------------------------------------------------------------------------------------------------------------------------------------------------------------------------------------|-----------------------------------------------|
|                          |    | (b) Give reasons for non-participation at each stage                                                                                                                                                         | 5 & 9                                         |
|                          |    | (c) Consider use of a flow diagram                                                                                                                                                                           | n/a                                           |
| Descriptive data         | 14 | (a) Give characteristics of study participants (eg demographic, clinical, social) and information on exposures and potential confounders                                                                     | Table 1                                       |
|                          |    | (b) Indicate number of participants with missing data for each variable of interest                                                                                                                          | Table 1                                       |
| Outcome data             | 15 | Report numbers of outcome events or summary measures                                                                                                                                                         | 11                                            |
| Main results             | 16 | (a) Give unadjusted estimates and, if applicable, confounder-adjusted estimates and their precision (eg, 95% confidence interval). Make clear which confounders were adjusted for and why they were included | Table 2                                       |
|                          |    | (b) Report category boundaries when continuous variables were categorized                                                                                                                                    | n/a                                           |
|                          |    | (c) If relevant, consider translating estimates of relative risk into absolute risk for a meaningful time period                                                                                             | n/a                                           |
| Other analyses           | 17 | Report other analyses done—eg analyses of subgroups and interactions, and sensitivity analyses                                                                                                               | Table 3                                       |
| <b>Discussion</b>        |    |                                                                                                                                                                                                              |                                               |
| Key results              | 18 | Summarise key results with reference to study objectives                                                                                                                                                     | 13-14                                         |
| Limitations              | 19 | Discuss limitations of the study, taking into account sources of potential bias or imprecision. Discuss both direction and magnitude of any potential bias                                                   | 16                                            |
| Interpretation           | 20 | Give a cautious overall interpretation of results considering objectives, limitations, multiplicity of analyses, results from similar studies, and other relevant evidence                                   | 14-16                                         |
| Generalisability         | 21 | Discuss the generalisability (external validity) of the study results                                                                                                                                        | 17<br>(feasible to conduct large-scale study) |
| <b>Other information</b> |    |                                                                                                                                                                                                              |                                               |
| Funding                  | 22 | Give the source of funding and the role of the funders for the present study and, if applicable, for the original study on which the present article is based                                                | 18                                            |



**Are physiological attributes of jockeys predictors of falls?: A controlled pilot study.**

|                               |                                                                                                                                                                                                                                                                                          |
|-------------------------------|------------------------------------------------------------------------------------------------------------------------------------------------------------------------------------------------------------------------------------------------------------------------------------------|
| Journal:                      | <i>BMJ Open</i>                                                                                                                                                                                                                                                                          |
| Manuscript ID:                | bmjopen-2011-000142.R1                                                                                                                                                                                                                                                                   |
| Article Type:                 | Research                                                                                                                                                                                                                                                                                 |
| Date Submitted by the Author: | 12-May-2011                                                                                                                                                                                                                                                                              |
| Complete List of Authors:     | Hitchens, Peta; Menzies Research Institute Tasmania<br>Blizzard, Leigh; Menzies Research Institute Tasmania<br>Jones, Graeme; Menzies Research Institute Tasmania<br>Day, Lesley; Monash Injury Research Institute<br>Fell, James; University of Tasmania, School of Human Life Sciences |
| <b>Subject Heading</b>:       | Occupational & environmental medicine                                                                                                                                                                                                                                                    |
| Keywords:                     | SPORTS MEDICINE, EPIDEMIOLOGY, OCCUPATIONAL & INDUSTRIAL MEDICINE                                                                                                                                                                                                                        |
|                               |                                                                                                                                                                                                                                                                                          |

SCHOLARONE™  
Manuscripts

only

**Are physiological attributes of jockeys predictors of falls?: A controlled pilot study.**

P Hitchens<sup>1</sup>, L Blizzard<sup>2</sup>, G Jones<sup>3</sup>, L Day<sup>4</sup>, J Fell<sup>5</sup>

- 1 Menzies Research Institute, University of Tasmania, Private Bag 23, Hobart TAS 7001, Australia,petaleeh@utas.edu.au
- 2 Menzies Research Institute, University of Tasmania, Private Bag 23, Hobart TAS 7001, Australia,Leigh.Blizzard@utas.edu.au
- 3 Menzies Research Institute, University of Tasmania, Private Bag 23, Hobart TAS7001, Australia,G.Jones@utas.edu.au
- 4 Monash Injury Research Institute, Building 70, Monash University VIC 3800, Australia, Lesley.Day@monash.edu
- 5 School of Human Life Sciences, University of Tasmania, Locked Bag 1320Launceston TAS 7250, Australia,James.Fell@utas.edu.au

**Corresponding author:**

Associate Professor Leigh Blizzard

Postal address: Private Bag 23, Menzies Research Institute, Hobart TAS 7001

Email: Leigh.Blizzard@utas.edu.au

Telephone: +61 3 6226 7719

Fax: +61 3 6226 7704

**Type of manuscript:** Original Article

**Total word count:**3,320 (excluding title page, abstract, references, tables and figures)

**Abstract word count:** 233 words

**Number of tables:** 3 **Number of figures:** 0

## ABSTRACT

**Objectives:** This pilot study describes the physiological attributes of jockeys and track-work riders in Tasmania and investigates whether these attributes are associated with falls.

**Methods:** All jockeys and track-work riders licensed in Tasmania were invited to participate. The study group consisted of 8 jockeys (2 female, 6 male) and 20 track-work riders (14 female, 6 male). Measures of anthropometry, balance, reaction time, isometric strength, vertical jump, glycolytic and aerobic fitness, flexibility and body composition were conducted. Tests were designed to assess specific aspects of rider fitness and performance relevant to horse racing. For a subset of participants (n=14), we obtained information on falls and injuries. We used Poisson regression to estimate incidence rate ratios.

**Results:** Jockeys had better balance, faster mean reaction time, lower fatigue index, and a higher estimated  $\dot{V}O_{2\text{max}}$  than their track-work riding counterparts. Jockeys were also younger and smaller in stature than track-work riders and, when differences in body mass were taken into account, they had greater muscular strength and muscular (alactic) power. Important factors found to be associated with falls were lower aerobic and anaerobic fitness, greater muscular strength and power, and riding with the full foot in the stirrup irons compared to riding on the ball of the foot.

**Conclusion:** This pilot study shows that physiological attributes of jockeys and track-work riders can predict their risk of falling and are measurable using methods feasible for large-scale field work.

### Key Words (MeSH)

Horse riding, muscle strength, fitness, body composition, bone density, injury

## ARTICLE SUMMARY

### Article focus

- Riding racehorses is a physically demanding and hazardous occupation, with most injuries to jockeys caused by falls.
- This study aims to investigate the association between physiological attributes and risk of falls for jockeys and track-work riders.

### Key messages

- Lower anaerobic and aerobic fitness and higher muscular strength and power were associated with greater risk of falls.
- Placement of the foot in the stirrup irons was also found to be associated with falls.
- This pilot study has confirmed that it is feasible to measure physiological attributes of jockeys and track-work riders that are predictive of the risk of falling.

### Strengths and limitations

- This was the first study to investigate whether physiological attributes are associated with falls to jockeys and track-work riders.
- Tests were deliberately restricted to those that could be conducted with robustly constructed and transportable equipment.
- We were able to recruit only a small number of participants, but our sample comprised 44% of the jockey population and 24% of the track-work rider population licensed in Tasmania.
- Some refinements to the testing methodology are needed.

## INTRODUCTION

The profession of a jockey or track-work rider in the thoroughbred racing industry is physically demanding. Riding race horses, during track-work or during a race, places demands on all three energy pathways (alactic, lactic and aerobic). Strength, strength endurance, balance, reaction time and flexibility are all considered to be important attributes of a successful rider.[1, 2]

A professional jockey in Australia may have as many as 1000 race rides per year, and may ride in races that range in distance from 800m to 3600m in races without jumps (“on the flat”) or from 2800m to 5500m in races over jumps. Jockeys may also undertake track-work riding. Track-work may involve riding many horses in training, and at varying intensities from walking a horse, slow or fast work, jump outs (practice jumping out of the barriers and galloping over a short distance) or barrier trials (unofficial races generally over shorter distances and with fewer starters, in which a horse or jockey may be assessed for suitability to compete in official races). Track-work riders are not able to ride in professional races unless they are a licensed jockey, and are generally heavier in weight than jockeys who need to be able to ride at weights as low as 51kg (flat races) or 64kg (jumps races).

There have been several studies describing the physical attributes and dietary habits of jockeys,[1, 3-7] and the demands of riding in races.[1, 8] The physiological attributes of grooms and exercise riders,[9] and the physiological demands of riding for equestrian and recreational horse riders[2, 10-14] have also been described. There is limited information on the fitness of jockeys, however, and no study has reported the fitness characteristics of track-work riders despite their integral role within the racing industry. The feasibility of

1  
2  
3 undertaking measurements of the physiological attributes of this highly mobile occupational  
4 group, using techniques suitable for large-scale fieldwork, has not been demonstrated.  
5  
6  
7  
8  
9

10 Further, there has been no investigation of the association between physiological attributes  
11 and risk of falls for jockeys and track-work riders. Riding racehorses is a hazardous  
12 occupation and most injuries to jockeys are caused by falls.[15] We have investigated risk  
13 factors for race-day jockey falls in flat racing using race-day data, and found that jockey-  
14 related factors included female sex of jockey, being an apprentice jockey, holding an amateur  
15 licence, and having fewer previous rides at a meeting.[16] We hypothesise that some  
16 physiological attributes of jockeys may also contribute to risk of falling. Given the lack of  
17 information on this occupational group, we undertook a study to describe the physiological  
18 attributes of jockeys and track-work riders licensed to ride in Tasmania and conducted a  
19 preliminary investigation into whether these attributes are associated with falls.  
20  
21  
22  
23  
24  
25  
26  
27  
28  
29  
30  
31  
32  
33  
34  
35

## 36 **METHODS**

37 We invited the participation of every jockey (n=18; 6 apprentice, 12 full-licensed) and track-  
38 work riders (n=85) who was licensed to ride in Tasmania, the island state of Australia, were  
39 invited to participate. Reasons for non-participation included riders not currently or regularly  
40 riding, injury or illness, living interstate or being ineligible by reason of age (we excluded  
41 riders older than 50 years). The final study group consisted of all of those who made  
42 themselves available: 8 jockeys (2 female full-licensed, 4 male apprentice, 1 male full-  
43 licensed and 1 male full-licensed jumps jockey) and 20 track-work riders (14 female, 6 male).  
44 This represents 44% of the jockey population and 24% of the track-work rider population in  
45 Tasmania.  
46  
47  
48  
49  
50  
51  
52  
53  
54  
55  
56  
57  
58  
59  
60

1  
2  
3 The study was approved by the Human Research Ethics Committee (Tasmania)(Reference  
4 Number H0009692).  
5  
6  
7  
8  
9

10 Each participant was tested at one of three different locations in Tasmania - Menzies  
11 Research Institute (Hobart), University of Tasmania Exercise Research Laboratory  
12 (Launceston) and the Devonport Racing Club (Devonport). The same equipment was  
13 transported to and used at each location. All tests were supervised by the same technician.  
14  
15  
16  
17  
18  
19

20 Tests were selected on their practicality and portability and based on previous studies of  
21 horse riders[1, 2, 8, 10-14] and performance attributes of athletes.[17] These tests were  
22 designed to assess specific aspects of fitness that may be relevant to the requirements of  
23 thoroughbred racing and track-work riding.  
24  
25  
26  
27  
28  
29  
30  
31

32 Participants were provided with an outline of the test protocols prior to formal testing.  
33  
34

35 Participants were required to be in good health and fully recovered from previous injuries.  
36  
37

38 For jockeys, testing did not occur on the day before or after race-day, or at times of  
39 significant body mass wasting.  
40  
41  
42  
43  
44

45 Height was measured to the nearest 0.1cm using a Leicester Height Measure (Invicta,  
46 Leicester, UK). Body mass was measured to the nearest 0.1kg using a Heine Portable  
47 Professional Scale (Heine, Dover, NH, USA). Body mass index (BMI) was calculated. Body  
48 composition (total percent body fat) and bone mineral density ( $\text{g}\cdot\text{cm}^{-2}$ ) were measured by the  
49 technique of dual-energy X-ray absorptiometry (DXA) using one Lunar DPX densitometer  
50 (Lunar, Madison, WI). Only 11 of the participants underwent a DXA scan, and therefore  
51 these results were not included in the falls analysis.  
52  
53  
54  
55  
56  
57  
58  
59  
60



1  
2  
3  
4  
5  
6 To measure dynamic unipedal balance, the participant was required to balance in a 'standing-  
7  
8 stork' pose (shoes removed, one leg lifted, placing the toes of that foot against the knee of the  
9  
10 opposite leg) on a 65mm foam insert (Airex® Balance-Pad Plus, Alcan Airex AG,  
11  
12 Switzerland) for as long as possible. A stopwatch was used to record the time that the  
13  
14 participant held position. The test was repeated three times on each leg. The best result for  
15  
16 each leg was used in analysis.  
17  
18  
19  
20  
21

22 The sit and reach test was used to measure flexibility of the lower back, hips and hamstring  
23  
24 muscles and the back and hip joints. Participants placed their feet flat against a 30cm high  
25  
26 box with shoes and socks removed and attempted to reach forward as far as possible with  
27  
28 knees fully extended. The level of the feet was recorded as the baseline, with positive scores  
29  
30 (in cm) achieved beyond this point. Participants were permitted three trials and the best result  
31  
32 was recorded.[18, 19]  
33  
34  
35  
36  
37  
38

39 Reaction time was assessed in milliseconds using a hand-held electronic timer with a light as  
40  
41 the stimulus, and with depression of a switch by the finger as the response (Balance Systems,  
42  
43 Sydney, NSW). Ten practice trials were undertaken, followed by ten experimental trials.[20]  
44  
45  
46  
47

48 Strength was measured using isometric dynamometers. Grip strength was measured using a  
49  
50 hand-grip dynamometer (Smedley's TTM 100kg, Tokyo), and shoulder and arm strength  
51  
52 using a shoulder/arm dynamometer (TTM 100kg, Tokyo). This involved both push strength  
53  
54 (maximal voluntary isometric contraction of the shoulder flexors/adductors) and pull strength  
55  
56 (maximum voluntary isometric contraction of the shoulder extensors/abductors). Results were  
57  
58 recorded to the nearest 0.5kg. Leg and back strength was measured using a leg/back  
59  
60

1  
2  
3 dynamometer (Gloria TTM 300kg, Tokyo). Participants performed a maximum voluntary  
4 isometric contraction of the knee and hip extensors, with the knees flexed at 115° while  
5 maintaining a vertical spine position. The result was recorded to the nearest 1kg. Three trials  
6 were conducted for all strength tests with the best result used for analysis.  
7  
8  
9  
10  
11

12  
13  
14  
15 To measure explosive leg power, the standing vertical jump (counter movement jump) was  
16 conducted using a Yardstick® (Swift Performance Equipment, Lismore, New South Wales).  
17 The best trial was recorded and reported in centimetres jumped.[19] From this result, peak  
18 and mean alactic power were calculated using the Harman formulas.[21]  
19  
20  
21  
22  
23  
24  
25  
26

27 Anaerobic (lactic) fitness was assessed by the 30 second cycle test using an air-braked  
28 ergometer (Exertech, EX-10, Repco, Huntingdale, Australia).[22] Mean and peak lactic  
29 power were recorded in watts (W) and watts per kilogram of body mass ( $W \cdot kg^{-1}$ ). The fatigue  
30 index (percentage decline in power compared with the peak power output) was calculated.  
31  
32  
33  
34  
35  
36  
37  
38

39 Aerobic fitness was assessed using the YMCA submaximal exercise test performed on a  
40 friction-braked cycle ergometer (MonarkErgomedic 828E, Varberg, Sweden) to estimate  
41 maximal oxygen uptake ( $\dot{V}O_{2 \max}$ ,  $ml \cdot kg^{-1} \cdot min^{-1}$ ).[17]  
42  
43  
44  
45  
46  
47  
48  
49

50 The participants were asked how they positioned their feet in the stirrup irons when riding  
51 (riding style). They were classified as riding with their full foot lodged firmly in the irons  
52 (full foot), or with the ball of their foot in the irons (ball of foot), or with only the toe of their  
53 boot in the iron (toe-in-iron).  
54  
55  
56  
57  
58  
59  
60

1  
2  
3 Incident data on falls of licensed Tasmanian track-work riders during track-work were  
4 collected by participants completing a diary for 12 months following their fitness assessment.  
5  
6 The follow-up period was 1 March 2008 to 31 May 2009. The participants were instructed to  
7  
8 record, on a monthly basis, the average number of track-work rides per week. For each fall,  
9  
10 participants were asked to complete an incident report form. Of the track-work riders, 7  
11  
12 returned their diaries.  
13  
14  
15  
16  
17  
18  
19

20 None of the jockeys returned their track-work diaries. However, we did obtain incident data  
21  
22 on falls at race meetings by the 7 licensed flat racing jockeys. The one jumps jockey did not  
23  
24 have any race rides recorded during the study period. The data were collated through a search  
25  
26 of stewards' reports provided by Racing Services Tasmania (RST), the principal racing  
27  
28 authority of that state. Racing Information Services Australia (RISA) provided  
29  
30 comprehensive data on every race meeting run by RST. These data were merged with the  
31  
32 incident falls data. Details are provided elsewhere.[15] To match the number of rides taken  
33  
34 by track-work riders, we included race rides during the period 1 June 2007 to 31 May 2009.  
35  
36  
37  
38  
39  
40

41 Anthropometric (height, mass, BMI, % body fat and BMD) and fitness (aerobic, anaerobic,  
42  
43 muscular strength and power, flexibility, balance and reaction time) measures of jockeys and  
44  
45 track-work riders were compared using regression analysis. Right-skewed data were log  
46  
47 transformed prior to analysis.  
48  
49  
50  
51  
52

53 Univariable Poisson regression was used to estimate incidence rate ratios (IRR) with 95%  
54  
55 confidence intervals (CI) by modelling the logarithm of the mean number of falls as a  
56  
57 function of covariates, with the logarithm of the number of rides as an offset. Interaction of  
58  
59 licence type was assessed from the coefficients of product terms. Effect modification was  
60

1  
2  
3 considered present if the test of the coefficient of a product term yielded a p value less than  
4  
5 0.05 in a dataset expanded with 9 duplicates. Results for variables that showed significant  
6  
7 interaction with licence type are reported separately (Table 3) from those where interaction  
8  
9 was not present (Table 2).  
10  
11

12  
13  
14  
15 To make an assessment of the possible significance of anaerobic fitness factors in a fully  
16  
17 powered main study, we expanded the dataset from n=14 to n=28 (to assess the effects of  
18  
19 peak power per kg of body mass and fatigue index) and to n=42 (to assess the effect of mean  
20  
21 power per kg of body mass) by duplicating observations.  
22  
23  
24  
25

## 26 27 **RESULTS**

28  
29 Participant age and anthropometric characteristics are described in Table 1. Jockeys were  
30  
31 younger in age, shorter in height, lower in mass and BMI, and had lower percentage total  
32  
33 body fat and total bone mineral density than track-work riders.  
34  
35

36  
37  
38 The participant groups were similar in measures of grip strength, shoulder pull strength, and  
39  
40 leg and back strength. Jockeys had better balance, faster reaction time, lower fatigue index,  
41  
42 and a higher estimated  $\dot{V}O_{2\text{max}}$ , but were less flexible and had lower shoulder push strength,  
43  
44 than track-work riders. Additionally, jockeys had greater muscular strength and power, once  
45  
46 accounting for the body mass (per kg) of the participant. Detailed results in relation to the  
47  
48 physiological attributes of jockeys and track-work riders are available in a Supplementary  
49  
50 Appendix.  
51  
52  
53  
54  
55  
56  
57  
58  
59  
60

Table 1: Descriptive characteristics of jockeys and track-work riders in Tasmania

| Study factor                           | Jockeys<br>(n=8) | Track-work riders<br>(n=20) |
|----------------------------------------|------------------|-----------------------------|
| Age (years)                            |                  |                             |
| Median                                 | 27.00            | 36.50                       |
| Mean ( $\pm$ SD)                       | 28.75(10.10)     | 33.20(11.08)                |
| Range                                  | 18, 41           | 15, 47                      |
| Height (cm)                            |                  |                             |
| Median                                 | 163.45           | 168.25                      |
| Mean ( $\pm$ SD)                       | 163.39 (7.08)    | 166.51 (7.36)               |
| Range                                  | 154.4, 174.9     | 156.6, 179.5                |
| Mass (kg)                              |                  |                             |
| Median                                 | 51.75            | 65.90                       |
| Mean ( $\pm$ SD)                       | 55.08 (5.87)     | 67.32 (12.51)               |
| Range                                  | 50.5, 66.3       | 44.2, 90.5                  |
| BMI                                    |                  |                             |
| Median                                 | 20.63            | 24.00                       |
| Mean ( $\pm$ SD)                       | 20.62 (1.58)     | 24.13 (3.28)                |
| Range                                  | 18.45, 23.27     | 18.02, 30.52                |
| Body fat (%) <sup>a</sup>              |                  |                             |
| Median                                 | 15.90            | 29.45                       |
| Mean ( $\pm$ SD)                       | 13.98 (3.52)     | 28.15 (8.21)                |
| Range                                  | 8.50, 16.90      | 17.00, 37.60                |
| BMD (g.cm <sup>-2</sup> ) <sup>a</sup> |                  |                             |
| Median                                 | 1.167            | 1.273                       |
| Mean ( $\pm$ SD)                       | 1.157 (0.068)    | 1.312 (0.103)               |
| Range                                  | 1.085, 1.246     | 1.206, 1.473                |

<sup>a</sup> Subset of data (n=5 jockeys; n=6 track-work riders).

Table 2 presents unadjusted and adjusted (for age and sex) incidence rate ratios of physiological attributes associated with falls for factors that did not differ between jockeys and track-work riders. Seven track-work riders returned their fall and injury diaries. The track-work riders reported a total of 24 falls from 2,996 rides (0.80 falls per 100 rides). Of these falls, 13 (54%) resulted in an injury being sustained. A total of 13 falls from 2,978 race rides (0.44 falls per 100 rides) were experienced by the jockeys in our study. Of these falls, 3 (23%) resulted in an injury being sustained.

Table 2: Unadjusted and adjusted incidence rate ratios of factors associated with race-day falls by flat racing jockeys (n=7) from 1 June 2007 to 31 May 2009, and with falls during track-work for track-work riders (n=7) from 1 March 2008 to 31 May 2009.

| Study factor                                                 | Falls | Rides | Unadjusted IRR (95% CI)        | Adjusted IRR (95% CI) <sup>a</sup> |
|--------------------------------------------------------------|-------|-------|--------------------------------|------------------------------------|
| Licence                                                      |       |       |                                |                                    |
| Jockey                                                       | 13    | 2,978 | 1.00                           | 1.00                               |
| Track-work rider                                             | 24    | 2,996 | 1.84 (0.90, 3.74)              | 3.54 (2.07, 6.06) <sup>d</sup>     |
| Sex                                                          |       |       |                                |                                    |
| Male                                                         | 15    | 2,519 | 1.00                           | 1.00                               |
| Female                                                       | 22    | 3,455 | 1.07 (0.52, 2.19)              | 0.45 (0.17, 1.20)                  |
| Age                                                          | 37    | 5,974 | 1.03 (1.00, 1.06)              | 1.05 (1.01, 1.10) <sup>b</sup>     |
| BMI                                                          | 37    | 5,974 | 1.12 (1.02, 1.21) <sup>b</sup> | 1.15 (1.08, 1.23) <sup>d</sup>     |
| Log of balance pooled (sec)                                  | 37    | 5,974 | 0.87 (0.59, 1.28)              | 1.28 (0.95, 1.72)                  |
| Flexibility (cm)                                             | 37    | 5,974 | 0.99 (0.94, 1.04)              | 0.96 (0.91, 1.01)                  |
| Muscular strength and power                                  |       |       |                                |                                    |
| Push strength (kg)                                           | 37    | 5,974 | 1.00 (0.97, 1.03)              | 1.00 (0.96, 1.04)                  |
| Pull strength (kg)                                           | 37    | 5,974 | 1.03 (0.98, 1.09)              | 1.09 (1.04,                        |
| Leg/back strength (kg/10)                                    | 37    | 5,974 | 1.11 (1.00, 1.23) <sup>b</sup> | 1.05 (0.98, 1.13)                  |
| Pooled grip strength (kg)                                    | 37    | 5,974 | 1.05 (0.96, 1.13)              | 1.02 (0.96, 1.09)                  |
| Absolute jump height (cm)                                    | 37    | 5,974 | 0.97 (0.92, 1.02)              | 0.93 (0.85, 1.01)                  |
| Mean power (Watts.kg <sup>-1</sup> )                         | 37    | 5,974 | 1.19 (0.94, 1.50)              | 1.14 (0.91, 1.42)                  |
| Anaerobic fitness                                            |       |       |                                |                                    |
| Mean power (Watts.kg <sup>-1</sup> )                         | 37    | 5,974 | 0.90 (0.77, 1.05)              | 0.85 (0.67, 1.09)                  |
| Peak power (Watts.kg <sup>-1</sup> )                         | 37    | 5,974 | 0.91 (0.82, 1.00)              | 0.87 (0.74, 1.02)                  |
| Total work (hectojoules.kg <sup>-1</sup> )                   | 37    | 5,974 | 0.78 (0.46, 1.32)              | 0.83 (0.34, 1.98)                  |
| Fatigue index (%)                                            | 37    | 5,974 | 0.97 (0.96, 0.99) <sup>d</sup> | 0.98 (0.96, 1.00)                  |
| Aerobic fitness                                              |       |       |                                |                                    |
| $\dot{V}O_{2\max}$ (ml.kg <sup>-1</sup> .min <sup>-1</sup> ) | 37    | 5,974 | 0.97 (0.93, 1.01)              | 0.93 (0.90, 0.97) <sup>d</sup>     |
| Riding style                                                 |       |       |                                |                                    |
| Ball of foot (n=9)                                           | 19    | 4,176 | 1.00                           | 1.00                               |
| Toe-in-iron (n=2)                                            | 5     | 684   | 1.61 (0.99, 2.61)              | 1.12 (0.60, 2.08)                  |
| Full foot (n=3)                                              | 13    | 1,114 | 2.56 (1.31, 5.04) <sup>c</sup> | 2.37 (1.46, 3.85) <sup>d</sup>     |

<sup>a</sup>Adjusted for age and sex; <sup>b</sup> p<0.05; <sup>c</sup> p<0.01; <sup>d</sup> p<0.001. Note: the adjusted measures of muscular strength have also been adjusted for body mass.

Table 2 shows that lower aerobic fitness was associated with greater risk of falls. Greater shoulder pull strength was also associated with a higher incidence of falls (Table 2). The effect of some measures of body composition and muscular power differed by licence type. Table 3 shows that jockeys with higher peak alactic power had a higher fall incidence than other jockeys, with the opposite being the case for track-work riders.

Table 3: Adjusted incidence rate ratios of factors associated with falls that differed by jockey and track-work riders

| Study factor                         | Jockey                         | Track-work rider               |
|--------------------------------------|--------------------------------|--------------------------------|
|                                      | IRR (95% CI) <sup>a</sup>      | IRR (95% CI) <sup>a</sup>      |
| Body mass (kg)                       | 0.82 (0.81, 0.83) <sup>d</sup> | 1.05 (1.02, 1.07) <sup>d</sup> |
| Height (cm)                          | 0.92 (0.89, 0.96) <sup>d</sup> | 1.05 (0.92, 1.19)              |
| Muscular power                       |                                |                                |
| Peak power (Watts.kg <sup>-1</sup> ) | 1.08 (1.04, 1.13) <sup>d</sup> | 0.95 (0.94, 0.96) <sup>d</sup> |

<sup>a</sup>Adjusted for age and sex; <sup>b</sup> p<0.05; <sup>c</sup> p<0.01; <sup>d</sup> p<0.001. Interactions by licence type: body mass(p<0.001), height (p<0.001), peak power (p<0.001).

Placement of the foot in the stirrup irons was associated with falls. Both jockeys and track-work riders that ride with the full foot in the stirrup irons had a higher fall incidence than did those riding with the ball of the foot in the irons (Table 2).

## DISCUSSION

In this investigation of the physiological attributes of jockeys and track-work riders in Tasmania, we found that jockeys had better balance, faster mean reaction time, lower fatigue index, and a higher estimated  $\dot{V}O_{2\max}$ . They were younger and smaller in stature than track-work riders and, when differences in body mass were taken into account, they had greater muscular strength and alactic power (derived from the vertical jump). Furthermore, in a study of falls experienced by jockeys on race-days and by track-work riders during track-work, we

1  
2  
3 found older age, higher BMI, greater shoulder pull strength, lower aerobic fitness, and riding  
4 with the full foot in the stirrup irons, were factors associated with an increased incidence of  
5 falls. Additionally, jockeys who were lower in mass, shorter in height, or had greater peak  
6  
7  
8  
9  
10  
11  
12  
13  
14  
15  
16  
17  
18  
19  
20  
21  
22  
23  
24  
25  
26  
27  
28  
29  
30  
31  
32  
33  
34  
35  
36  
37  
38  
39  
40  
41  
42  
43  
44  
45  
46  
47  
48  
49  
50  
51  
52  
53  
54  
55  
56  
57  
58  
59  
60

found older age, higher BMI, greater shoulder pull strength, lower aerobic fitness, and riding with the full foot in the stirrup irons, were factors associated with an increased incidence of falls. Additionally, jockeys who were lower in mass, shorter in height, or had greater peak alactic power (per kg of body mass) had a higher fall incidence than other jockeys, with the reverse being the case for track-work riders.

The anthropometric attributes of jockeys reported in this study were generally similar to those of New Zealand and Irish jockeys reported in previous studies,[5-7] but the track-work riders more closely resembled the anthropometric characteristics of participants in equestrian studies.[11, 14] The grip strength of the jockeys and track-work riders was similar to that of participants in a study of Irish jockeys,[6] but higher than that of participants in an equestrian study.[14] Both groups also had above average relative  $\dot{V}O_{2\max}$  and average flexibility compared to normative data,[17] and greater anaerobic (lactic) power than those from an equestrian study.[14] We do not have normative data on balance or reaction times for this age group with which to make comparisons.

In this study, lower anaerobic and aerobic fitness were associated with greater risk of falls. Only the association with aerobic fitness was statistically significant but, if our participants are representative of jockeys and track-work riders in general, the association with measures of anaerobic fitness would have been statistically significant for peak and mean power per kg of body mass and for fatigue index had the sample size been just one or two times greater (data not shown). This is the first report of a finding that fitness is associated with falls by jockeys and track-work riders, but it is consistent with findings for injuries to other occupational groups including manual material handlers[23] and military personnel.[24, 25]



1  
2  
3 There was some evidence that higher muscular strength and power were positively associated  
4 with falls. This was seen for shoulder pull strength, and for peak alactic power in jockeys.  
5  
6  
7  
8 This may be due to riders with greater strength and power being placed on difficult or  
9  
10 fractious horses because it is industry practice, where possible, to assign this task to the most  
11  
12 capable riders. Possibly consistent with this finding, industrial workers with greater isometric  
13  
14 strength have been reported to be at greater risk of back problems.[26] On the other hand,  
15  
16  
17  
18 opposite results were found for peak alactic power of track-work riders in our study. This may  
19  
20 reflect a true difference between jockeys and track-work riders, but we can not discount the  
21  
22 possibility that the associations with muscular strength and power are chance findings due to  
23  
24 the small sample size.  
25  
26  
27  
28

29  
30 Placement of the foot in the stirrup irons was found to be associated with falls for both  
31  
32 jockeys and track-work riders. Those riding with the full foot in the stirrup irons had a higher  
33  
34 fall incidence than those riding with the ball of the foot in the irons. We also found a small  
35  
36 and statistically insignificant increase in risk for those who ride with their toe in the iron. Due  
37  
38 to safety concerns, all principal racing authorities in Australia require apprentices to ride with  
39  
40 at least their ball of their foot in the irons until they have gained adequate experience (Ring  
41  
42 2010 pers. comm.). We had too few inexperienced riders in our study to investigate this issue.  
43  
44  
45  
46  
47

48  
49 This study adds to the limited information available on the physiological attributes of  
50  
51 jockeys, and is the first study to report comprehensively on the physiological characteristics  
52  
53 of track-work riders. A strength of this study was the comprehensive range of tests that was  
54  
55 implemented. For the benefit of industry participants and researchers, these results have been  
56  
57 made available in a Supplementary Appendix. Additionally, this allowed us to assess the  
58  
59 feasibility of applying this battery of tests in large-scale fieldwork with this highly mobile  
60

1  
2  
3 occupational group, and we were able to get some confirmation that doing so was practicable.  
4  
5 In a novel contribution, this was the first study to investigate whether these attributes are  
6  
7 associated with falls to riders in both licence groups and we found that measurements of  
8  
9 fitness and riding style were predictors of falls. So too were the measurements of muscular  
10  
11 strength and power, albeit in an unexpected direction.  
12  
13  
14  
15

16  
17 However, some limitations of this study should be borne in mind. Because our intention was  
18  
19 to investigate methods appropriate for large-scale fieldwork, we deliberately restricted tests to  
20  
21 those that could be conducted with robustly-constructed and transportable equipment. We did  
22  
23 not use more sensitive equipment that may be more accurate. Our sample of 8 jockeys and  
24  
25 track-work riders was small, and some of our findings – including the results for muscular  
26  
27 strength and power – may be a play of chance. Our sample comprised 44% of the jockey  
28  
29 population and 24% of the track-work rider population licensed in Tasmania. Other studies  
30  
31 involving jockeys have also reported low response proportions,[3, 27] and this is probably  
32  
33 due to the demanding working lives of those in this profession. Race meetings are conducted  
34  
35 less regularly in Tasmania than in large metropolitan areas in Australia, and thus the jockeys  
36  
37 in this current study may be more representative of the average jockey in Australia than of  
38  
39 elite jockeys who ride in races more often. That we had a high proportion of females among  
40  
41 track-work riders, and a low proportion of females among jockeys, is nevertheless consistent  
42  
43 with the population frequencies. Furthermore, only 35% of track-work riders returned their  
44  
45 fall and injury diaries and none of the jockeys returned theirs. It is possible that those who  
46  
47 experienced more falls or injuries were more likely to return their diaries, leading to possible  
48  
49 bias in the results if they also differed in respect of the factors associated with falls. Lastly,  
50  
51 our experience has suggested some refinements to the testing methodology are needed. To  
52  
53 obtain better measurements of  $\dot{V}O_{2\max}$ , portable gas analysis could be employed during racing  
54  
55  
56  
57  
58  
59  
60

1  
2  
3 and track-work. A more complex stimulus reaction time test, such as a go/no-go or choice  
4  
5 reaction time,[28] should be employed because the simple reaction time test we used was not  
6  
7 sufficiently sensitive to differentiate between groups and individuals. Furthermore, a riding-  
8  
9 relevant balance test or core-stability test with higher specificity is required. Additionally, we  
10  
11 had only self-reports of stirrup foot position. Ideally, assessment of this factor would be made  
12  
13 by a trained, independent observer.  
14  
15  
16  
17  
18  
19

## 20 CONCLUSION

21  
22 Riding thoroughbred racehorses is a hazardous occupation. This pilot study has confirmed  
23  
24 that it is feasible to measure physiological attributes of jockeys and track-work riders that are  
25  
26 predictive of the risk of falling. We have investigated risk factors for falls among jockeys  
27  
28 using routinely collected race-day data[16] but without the insights that may be possible  
29  
30 from actual measurements of the jockeys. What is now required is a large-scale study of the  
31  
32 physiological attributes of jockeys, that can provide the evidence base for improvements to  
33  
34 apprentice training and remedial riding programmes designed to remedy deficits in  
35  
36 physiological performance that lead to falls and possibly to establish minimum standards of  
37  
38 performance for jockey licencing.  
39  
40  
41  
42  
43  
44  
45  
46  
47  
48  
49  
50  
51  
52  
53  
54  
55  
56  
57  
58  
59  
60

## ACKNOWLEDGEMENTS

The research team thank Betfair Australasia, TOTE Tasmania and the Tasmanian Thoroughbred Racing Council for funding in support of this study. Protocols to assess physiological parameters were developed in consultation with the Tasmanian Jockeys' Association. We acknowledge Racing Information Services Australia (RISA) for provision of race data, Racing Services Tasmania for provision of stewards' reports, and Tim Albion for database support.

## COMPETING INTERESTS

None declared.

## FUNDING

Monetary donations for this project were received from Betfair Australasia, TOTE Tasmania and the Tasmanian Thoroughbred Racing Council. None of these entities were involved in any part of planning, design or conduct of the study, and they did not have any input into the manuscript.

## AUTHOR CONTRIBUTIONS

All authors contributed to analysis and interpretation of data, review and revision of the manuscript critically for important intellectual content, and provided final approval of the version to be published. Additionally, Peta Hitchens, Leigh Blizzard, and James Fell contributed to conception and design of the study, acquisition of data and drafting of the manuscript. I confirm that this manuscript is an independent contribution, has been read and approved by all co-authors.

## REFERENCES

1. Maddox D. For jockeys, small is beautiful - but difficult. *The physician and sportsmedicine* 1976;4(7):89-94.
2. Westerling D. A study of physical demands in riding. *Eur J ApplPhysiol* 1983;50:373-382.
3. King MB, Mezey G. Eating behaviour of male racing jockeys. *Psychol Med* 1987;17(1):249-53.
4. Apted J. Lifestyle of nine jockeys. In: Truswell AS, Wahlqvist ML, eds. *Food habits in Australia*. Australia: Rene Gordon 1988:291-297.
5. Leydon MA, Wall C. New Zealand jockeys' dietary habits and their potential impact on health. *Int J Sport NutrExercMetab* 2002;12(2):220-37.
6. Warrington G, Dolan E, McGoldrick A, et al. Chronic weight control impacts on physiological function and bone health in elite jockeys. *J Sports Sci* 2009;27(6):543-550.
7. Waldron-Lynch F, Murray B, Brady J, et al. High bone turnover in Irish professional jockeys. *OsteoporosInt* 2010;21(3):521-525.
8. Trowbridge EA, Cotterill JV, Crofts CE. The physical demands of riding in National Hunt races. *Eur J ApplPhysiol* 1995;70:66-69.
9. Tobar H, Yamagishi K, Noda H, et al. Body mass index and serum gamma-glutamyltransferase level as risk factors for injuries related to professional horse racing: a prospective study. *J Occup Health* 2009;51(4):323-331.
10. Gutierrez Rincon JA, VivesTurco J, Muro Martinez I, et al. A comparative study of the metabolic effort expended by horse riders during a jumping competition. *Br J Sports Med* 1992;26(1):33-35.

- 1  
2  
3 11. Alfredson H, Hedberg G, Bergström E, et al. High thigh muscle strength but not bone  
4 mass in young horseback-riding females. *Calcif Tissue Int* 1998;62(6):497-501.  
5  
6
- 7 12. Devienne MF, Guezennec CY. Energy expenditure of horse riding. *Eur J Appl Physiol*  
8 2000;82(5):499-503.  
9
- 10 13. Lagarde J, Peham C, Licka T, et al. Coordination dynamics of the horse-rider system.  
11 *J Mot Behav* 2005;37(6):418-425.  
12
- 13 14. Meyers MC. Effect of equitation training on health and physical fitness of college  
14 females. *Eur J Appl Physiol* 2006;98:177-184.  
15
- 16 15. Hitchens PL, Blizzard CL, Jones G, et al. The incidence of race-day jockey falls in  
17 Australia, 2002–2006. *MJA* 2009;190(2):83-86.  
18
- 19 16. Hitchens PL, Blizzard CL, Jones G, et al. Predictors of race-day jockey falls in flat  
20 racing in Australia. *Occup Environ Med* 2010;67:693-698. Published Online First: 23  
21 June 2010 doi:10.1136/oem.2009.050567  
22
- 23 17. American College of Sports Medicine. ACSM's Guidelines for exercise testing and  
24 prescription. 8 ed. Philadelphia: Lea & Febiger / Lippincott Williams & Wilkins 2010.  
25
- 26 18. Wells KF, Dillon EK. The sit and reach - A test of back and leg flexibility. *Res Q*  
27 *Exerc Sport* 1952;23:115-118.  
28
- 29 19. Ellis L, Gustin P, Lawrens S, et al. Testing protocols for the physiological assessment  
30 of team sports players. In: Gore CJ, ed. *Physiological tests for elite athletes*. Belconnen  
31 ACT: Australian Sport Commission 2000:128-144.  
32
- 33 20. Lord SR, Menz HB, Tiedemann A. A physiological profile approach to falls risk  
34 assessment and prevention. *Phys Ther* 2003;83(3):237-252.  
35
- 36 21. Harman EA, Rosenstein MT, Frykman PN, et al. Estimation of human power output  
37 from vertical jump. *J Appl Sports Sci Res* 1991;5:116-120.  
38  
39  
40  
41  
42  
43  
44  
45  
46  
47  
48  
49  
50  
51  
52  
53  
54  
55  
56  
57  
58  
59  
60

- 1  
2  
3  
4  
5  
6  
7  
8  
9  
10  
11  
12  
13  
14  
15  
16  
17  
18  
19  
20  
21  
22  
23  
24  
25  
26  
27  
28  
29  
30  
31  
32  
33  
34  
35  
36  
37  
38  
39  
40  
41  
42  
43  
44  
45  
46  
47  
48  
49  
50  
51  
52  
53  
54  
55  
56  
57  
58  
59  
60
22. Telford RD, Minikin BR, Hahn AG. A simple method for the assessment of general fitness: the tri-level profile. *J Sci Med Sport* 1989;21:6-9.
  23. Craig BN, Congleton JJ, Kerk CJ, et al. Personal and non-occupational risk factors and occupational injury/illness. *Am J Ind Med* 2006;49(4):249-260.
  24. Knapik J, Ang P, Reynolds K, et al. Physical fitness, age, and injury incidence in infantry soldiers. *J Occup Med* 1993;35(6):598-603.
  25. Jones BH, Bovee MW, Harris III JM, et al. Intrinsic risk factors for exercise-related injuries among male and female army trainees. *Am J Sports Med* 1993;21(5):705-710.
  26. Batti'E MC, Bigos SJ, Fisher LD, et al. Isometric lifting strength as a predictor of industrial back pain reports. *Spine* 1989;14(8):851-856.
  27. Speed H, Seedsman T, Morris T, et al. *The welfare of retired jockeys*. Victoria: Victorian University of Technology, Centre for Rehabilitation, Exercise and Sports Science 2001.
  28. Welford AT. Choice reaction time: Basic concepts. In: Welford AT, ed. *Reaction Times*. New York: Academic Press 1980:73-128.

**LICENCE FOR PUBLICATION STATEMENT**

The Corresponding Author has the right to grant on behalf of all authors and does grant on behalf of all authors, an exclusive licence (or non exclusive for government employees) on a worldwide basis to the BMJ Publishing Group Ltd to permit this article (if accepted) to be published in BMJ Open and any other BMJ PGL products and sub-licences such use and exploit all subsidiary rights, as set out in our licence (<http://oem.bmj.com/ifora/licence.pdf>).

For peer review only



STROBE Statement—Checklist of items that should be included in reports of *cross-sectional studies*

Note: Page numbers are those displayed in the top left/right corner of the submission pdf.

|                              | Item No | Recommendation                                                                                                                                                                                    | Page No.                            |
|------------------------------|---------|---------------------------------------------------------------------------------------------------------------------------------------------------------------------------------------------------|-------------------------------------|
| <b>Title and abstract</b>    | 1       | (a) Indicate the study's design with a commonly used term in the title or the abstract                                                                                                            | Title page                          |
|                              |         | (b) Provide in the abstract an informative and balanced summary of what was done and what was found                                                                                               | 2                                   |
| <b>Introduction</b>          |         |                                                                                                                                                                                                   |                                     |
| Background/rationale         | 2       | Explain the scientific background and rationale for the investigation being reported                                                                                                              | 4-5                                 |
| Objectives                   | 3       | State specific objectives, including any prespecified hypotheses                                                                                                                                  | 5                                   |
| <b>Methods</b>               |         |                                                                                                                                                                                                   |                                     |
| Study design                 | 4       | Present key elements of study design early in the paper                                                                                                                                           | 5-6                                 |
| Setting                      | 5       | Describe the setting, locations, and relevant dates, including periods of recruitment, exposure, follow-up, and data collection                                                                   | 5, 6 & 9                            |
| Participants                 | 6       | (a) Give the eligibility criteria, and the sources and methods of selection of participants                                                                                                       | 5                                   |
| Variables                    | 7       | Clearly define all outcomes, exposures, predictors, potential confounders, and effect modifiers. Give diagnostic criteria, if applicable                                                          | 6-10                                |
| Data sources/<br>measurement | 8       | For each variable of interest, give sources of data and details of methods of assessment (measurement). Describe comparability of assessment methods if there is more than one group              | 6-10                                |
| Bias                         | 9       | Describe any efforts to address potential sources of bias                                                                                                                                         | Potential bias discussed on page 16 |
| Study size                   | 10      | Explain how the study size was arrived at                                                                                                                                                         | 5 (pilot)                           |
| Quantitative variables       | 11      | Explain how quantitative variables were handled in the analyses. If applicable, describe which groupings were chosen and why                                                                      | 6-10                                |
| Statistical methods          | 12      | (a) Describe all statistical methods, including those used to control for confounding                                                                                                             | 9-10                                |
|                              |         | (b) Describe any methods used to examine subgroups and interactions                                                                                                                               | 9-10                                |
|                              |         | (c) Explain how missing data were addressed                                                                                                                                                       | n/a                                 |
|                              |         | (d) If applicable, describe analytical methods taking account of sampling strategy                                                                                                                | n/a                                 |
|                              |         | (e) Describe any sensitivity analyses                                                                                                                                                             | n/a                                 |
| <b>Results</b>               |         |                                                                                                                                                                                                   |                                     |
| Participants                 | 13      | (a) Report numbers of individuals at each stage of study—eg numbers potentially eligible, examined for eligibility, confirmed eligible, included in the study, completing follow-up, and analysed | 5 & 9                               |

|                          |    |                                                                                                                                                                                                              |                                               |
|--------------------------|----|--------------------------------------------------------------------------------------------------------------------------------------------------------------------------------------------------------------|-----------------------------------------------|
|                          |    | (b) Give reasons for non-participation at each stage                                                                                                                                                         | 5 & 9                                         |
|                          |    | (c) Consider use of a flow diagram                                                                                                                                                                           | n/a                                           |
| Descriptive data         | 14 | (a) Give characteristics of study participants (eg demographic, clinical, social) and information on exposures and potential confounders                                                                     | Table 1                                       |
|                          |    | (b) Indicate number of participants with missing data for each variable of interest                                                                                                                          | Table 1                                       |
| Outcome data             | 15 | Report numbers of outcome events or summary measures                                                                                                                                                         | 11                                            |
| Main results             | 16 | (a) Give unadjusted estimates and, if applicable, confounder-adjusted estimates and their precision (eg, 95% confidence interval). Make clear which confounders were adjusted for and why they were included | Table 2                                       |
|                          |    | (b) Report category boundaries when continuous variables were categorized                                                                                                                                    | n/a                                           |
|                          |    | (c) If relevant, consider translating estimates of relative risk into absolute risk for a meaningful time period                                                                                             | n/a                                           |
| Other analyses           | 17 | Report other analyses done—eg analyses of subgroups and interactions, and sensitivity analyses                                                                                                               | Table 3                                       |
| <b>Discussion</b>        |    |                                                                                                                                                                                                              |                                               |
| Key results              | 18 | Summarise key results with reference to study objectives                                                                                                                                                     | 13-14                                         |
| Limitations              | 19 | Discuss limitations of the study, taking into account sources of potential bias or imprecision. Discuss both direction and magnitude of any potential bias                                                   | 16-17                                         |
| Interpretation           | 20 | Give a cautious overall interpretation of results considering objectives, limitations, multiplicity of analyses, results from similar studies, and other relevant evidence                                   | 14-17                                         |
| Generalisability         | 21 | Discuss the generalisability (external validity) of the study results                                                                                                                                        | 17<br>(feasible to conduct large-scale study) |
| <b>Other information</b> |    |                                                                                                                                                                                                              |                                               |
| Funding                  | 22 | Give the source of funding and the role of the funders for the present study and, if applicable, for the original study on which the present article is based                                                | 18                                            |
